# Supplementary material for: Evaluation of Antibiotic Resistance in Bacterial Strains Isolated from Sewage of Slaughterhouses Located in Sicily (Italy)
Source: MDPI journal article supplement (doi:10.3390/ijerph18189611), 2021-09-12
Supplement: s1 [file s1]

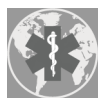

Supplementary Material for “Role of wastewater from slaughterhouses in the spread of antibiotic resistance” Facciola A, Virga A, Giofrè ME, Laganà P.

**Table S1.** List of assayed antibiotics with the doses for each drug, grouped in classes according to their mechanism of action.

|                                                          |                               |                        |                                            |                             |
|----------------------------------------------------------|-------------------------------|------------------------|--------------------------------------------|-----------------------------|
| CELL WALL INHIBITING AND DISRUPTING MEMBRANE ANTIBIOTICS | B-LACTAMS                     | PENICILLINS            | Natural penicillins                        | penicillin (P, 1 unit,)     |
|                                                          |                               |                        | Aminopenicillins                           | amoxicillin (AML, 10 µg)    |
|                                                          |                               |                        |                                            | ampicillin (AMP, 10 µg)     |
|                                                          |                               |                        | Carboxipenicillins                         | carbenicillin (CAR, 100 µg) |
|                                                          |                               |                        | Ureidopenicillins                          | mezlocillin (MEZ, 75 µg)    |
|                                                          |                               |                        |                                            | piperacillin (PRL, 100 µg)  |
|                                                          |                               |                        | Penicillinase-resistant penicillins        | oxacillin (OX, 1 µg)        |
|                                                          |                               |                        |                                            | meticillin (MET, 5µg)       |
|                                                          |                               | Combinated penicillins | amoxicillin + clavulanic acid (AMC, 30 µg) |                             |
|                                                          |                               | CEPHALOSPORINS         | 1 <sup>st</sup> generation                 | cefazolin (KZ, 30 µg)       |
|                                                          |                               |                        | 2 <sup>nd</sup> generation                 | cefoxitin (FOX, 30 µg)      |
|                                                          |                               |                        |                                            | cefuroxime (CXM, 30 µg)     |
|                                                          |                               |                        | 3 <sup>rd</sup> generation                 | cefotaxime (CTX, 30 µg)     |
|                                                          |                               |                        |                                            | ceftazidime (CAZ, 30 µg)    |
| ceftriaxone (CRO, 30 µg)                                 |                               |                        |                                            |                             |
| CARBAPENEMS                                              | imipenem (IML, 10 µg)         |                        |                                            |                             |
| MONOBACTAMS                                              | aztreonam (AZM, 30 µg)        |                        |                                            |                             |
| GLYCO - PEPTIDES                                         | vancomycin (VAN, 30 µg)       |                        |                                            |                             |
|                                                          | teicoplanin (TEC), 30 µg)     |                        |                                            |                             |
| fosfomycin (FOS, 50 µg)                                  |                               |                        |                                            |                             |
| POLYMIXINS                                               | colistin sulphate (CS, 10 µg) |                        |                                            |                             |

|                                      |                                           |                 |                                  |  |
|--------------------------------------|-------------------------------------------|-----------------|----------------------------------|--|
| NUCLEIC ACIDS INHIBITING ANTIBIOTICS | INHIBITING DNA TOPOISOMERASIS ANTIBIOTICS | QUINOLONES      | cinoxacin (CIN, 100 µg)          |  |
|                                      |                                           |                 | nalidixic acid (NA, 30 µg)       |  |
|                                      |                                           |                 | pipemidic acid (PI, 20 µg)       |  |
|                                      |                                           | FLUORQUINOLONES | ciprofloxacin (CIP, 5 µg)        |  |
|                                      |                                           |                 | levofloxacin (LEV, 5 µg)         |  |
|                                      |                                           |                 | norfloxacin (NOR, 10 µg)         |  |
|                                      |                                           |                 | ofloxacin (OFX, 5 µg)            |  |
|                                      | INHIBITING FOLIC ACID                     | SULFONAMIDES    | sulphamethoxazole + trimethoprim |  |

|                                          |                                      |                      |                                   |
|------------------------------------------|--------------------------------------|----------------------|-----------------------------------|
|                                          | SYNTHESIS ANTIBIOTICS                |                      | (SXT, 25 µg)                      |
|                                          | INHIBITING RNA SYNTHESIS ANTIBIOTICS | RIFAMYCINS           | <i>rifampicin</i> (RD, 30 µg)     |
|                                          | DNA INHIBITORS ANTIBIOTICS           | NITROFURANS          | <i>nitrofurantoin</i> (F, 300 µg) |
| PROTEIN SYNTHESIS INHIBITING ANTIBIOTICS | 30S SUBUNIT INHIBITORS               | AMINOGLYCOSIDES      | <i>amikacin</i> (AK, 30 µg)       |
|                                          |                                      |                      | <i>gentamycin</i> (CN, 10 µg)     |
|                                          |                                      |                      | <i>netilmicin</i> (NET, 30 µg)    |
|                                          |                                      |                      | <i>sisomicin</i> (SIS, 30 µg)     |
|                                          |                                      |                      | <i>tobramycin</i> (TOB, 10 µg)    |
|                                          |                                      | TETRACYCLINES        | <i>doxycyclin</i> (DO, 30 µg)     |
|                                          |                                      |                      | <i>tetracycline</i> (TE, 30 µg)   |
|                                          |                                      |                      | <i>minocycline</i> (MN, 30 µg)    |
|                                          |                                      | GLYCYLCYCLINES       | <i>tigecycline</i> (TGC, 15 µg)   |
|                                          | 50S SUBUNIT INHIBITORS               | MACROLIDES           | <i>azithromycin</i> (AZM, 15 µg)  |
|                                          |                                      |                      | <i>eritromycin</i> (E, 15 µg)     |
|                                          |                                      | LINCOSAMIDES         | <i>lincomycin</i> (MY, 2 µg)      |
|                                          |                                      |                      | <i>clindamycin</i> (DA, 10 µg)    |
|                                          |                                      | OXAZOLIDINONES       | <i>linezolid</i> (LNZ, 10 µg)     |
|                                          |                                      | PHENOLIC DERIVATIVES | <i>chloramphenicol</i> (C, 30 µg) |
